# Supplementary material for: Geomagnetic Superchron: Consequence of Supercontinent’s Breakup or Assembly
Source: Research Square preprint supplement (doi:10.21203/rs.3.rs-1778639/v1), 2022-07-01
Supplement: Supplementary file 1 [file 4c4f90d9a48270f149083a9a.docx]

**Supplementary Materials**

Table S1. The datum of LIPs16,20-22

| Linked to the African or Pacific LLSVP (superplume) | Name and age of LIPs |
| --- | --- |
| The red solid line representes linked to the African LLSVP (superplume), from right to left is: | 1. Ethiopia(31Ma); 2.North Atlantic(54Ma);  3. Deccan Traps(65Ma); 4. S.Leone Rise(73Ma);  5. Madagascar(84Ma); 6. Broken Ridge(95Ma);  7. Wallaby Plateau(96Ma); 8. Central Kerguelen(100Ma);  9. Southern Kerguelen(114Ma);  10. Rajmahal Traps(118Ma); 11. Banbury Basalts(132Ma);  12. Parana-Etendeka(132Ma); 13. Gascoyne(136Ma);  14.Karroo(183Ma); 15. CAMP(201Ma);  16. Panjal Traps(285Ma); 17. Skagerrak LIP(297Ma);  18.Yakutsk LIP (360 Ma); 19. Altay-Sayan (400Ma);  20. Kalkarindji (510Ma). |
| The cray solid line representes linked to the Pacific LLSVP (superplume), from right to left is: | 1. Ontong Java 2(90Ma); 2. Hess Rise(99Ma);  3. Nauru(111Ma); 4. Ontong Java 1(121Ma);  5. Manihiki Plateau(123Ma); 6. Magellan Rise(145Ma);  7. Shatsky Rise(147Ma); 8. Emeishan(258Ma). |


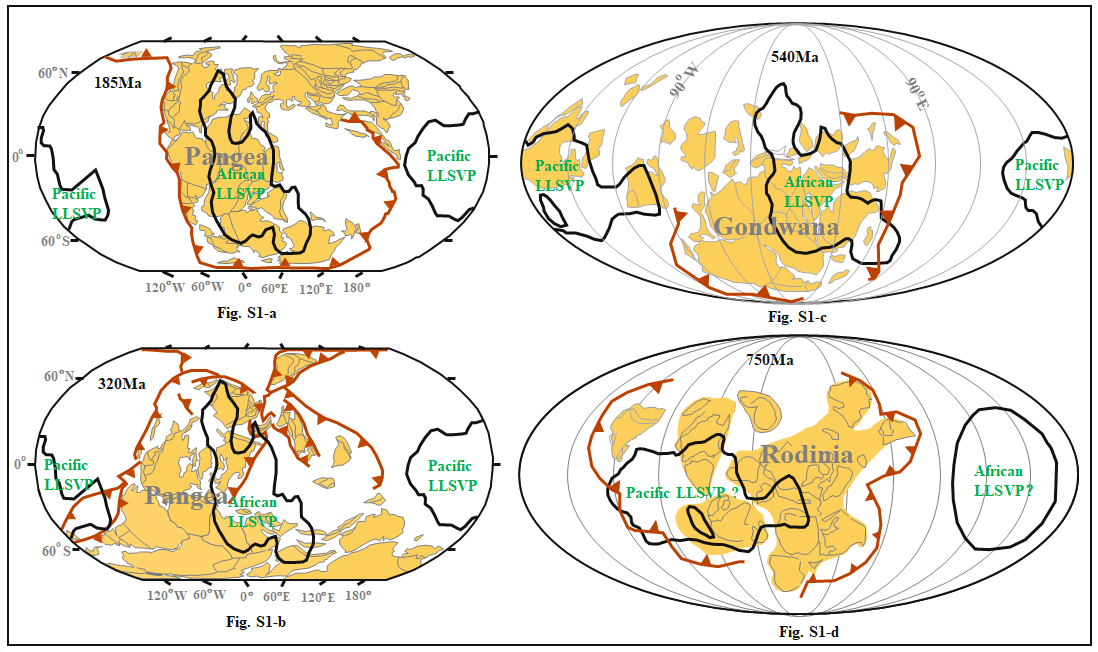


Figure S1. Reconstruction of plate tectonics at 185 Ma (a) 67, 320 Ma (b) 67, 540 Ma (c) 21,67,71 and 750 Ma (d) 67,69,71, showing the distribution of subduction zones and the possible locations of the Pacific and African LLVSPs (modified after Refs. 21, 40, 67, 69 and 71).
